# Supplementary material
Source: PubMed Central journal article supplement (PMC5922270)
Supplement: NIHMS954293-supplement-Supplemental_Figures.pdf [file NIHMS954293-supplement-Supplemental_Figures.pdf]

## Supplementary Figure 1: Primer List

### A) Primers cloned into pX330 to generate exon 4-specific gRNA

| gRNA Name | Primers Sequence                                          |
|-----------|-----------------------------------------------------------|
| <b>A</b>  | 5'-CCAGGACCAGAGCCAGGACA-3'<br>3'-TGT CCTGGCTCTGGTCCTGG-5' |
| <b>B</b>  | 5'-GAGACCAGGCCCTCAGGGGA-3'<br>3'-TCCCCTGAGGGCCTGGTCTC-5'  |
| <b>C</b>  | 5'-CCAGAAGTGGGCGGCCCTGG-3'<br>3'-CCAGGGCCGCCCACTTCTGG-5'  |

### B) Primers used to amplify SLA cDNA

| Locus | Allele<br>(Accession<br>Number) | Coding Sequence (5'-3')                                           | Amplicon<br>Size (bases) |
|-------|---------------------------------|-------------------------------------------------------------------|--------------------------|
| SLA-1 | 0702<br>(EU440330.1)            | F: ATG GGG CCT GGA GCC CTC TTC<br>R: TCA GTC CCC ACA AGG CAG      | 1109                     |
| SLA-1 | 1201<br>(EU440335.1)            | F: ATG GGG CCT GGA GCC CTC TTC<br>R: TCA GTC CCC ACA AGG CAG C    | 1109                     |
| SLA-1 | 1301<br>(EU440336.1)            | F: ATG GGG CCT GGA GCC CTC TTC<br>R: GGA TTC ACA AAG TGG GAC      | 1147                     |
| SLA-2 | 0202<br>(EU432081.1)            | F: ATG CGG GTC AGG GGC CCT CAA G<br>R: TCA GTC CCC ACA AGG CAG C  | 1118                     |
| SLA-2 | 1001<br>(EU432084.1)            | F: ATG CGG GTC AGG GGC CCT CAA G<br>R: TCA GTC CCC ACA AGG CAG C  | 1118                     |
| SLA-3 | 0402<br>(EU432092.1)            | F: ATG GGG CCC CGA GCC CTC GTT<br>R: TTG GTC CCC ACA AGG CAG C    | 1106                     |
| SLA-3 | 0502<br>(EU432094.1)            | F: ATG GGG CCC CGA GCC CTC GTC CT<br>R: TCA GTC CCC ACA AGG CAG C | 1109                     |

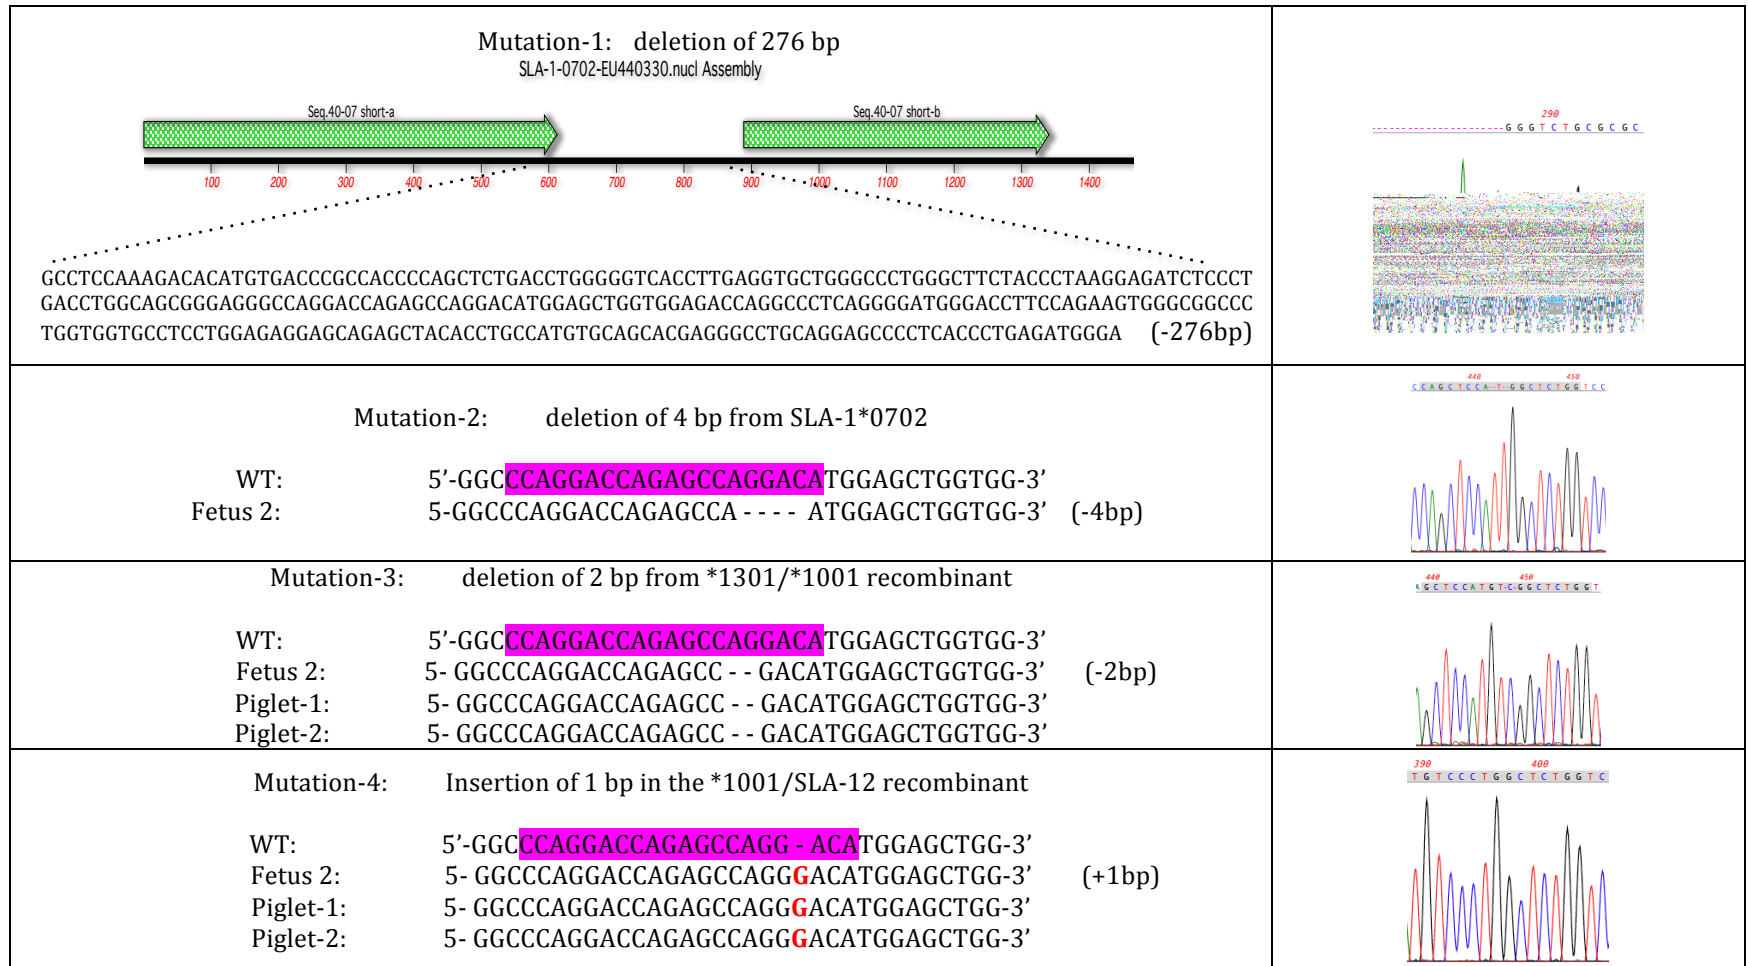

**Supplementary Figure 2: Electropherogram revealing insertions and deletions in SLA cDNA.** The purple box highlights the gRNA target.
